*Invited Comment*

## G protein $\beta 3$ subunit 825T allele, hypertension, obesity, and diabetic nephropathy

Winfried Siffert

Institut für Pharmakologie, Universitätsklinikum Essen, Essen, Germany

**Abstract** The 825T allele of the gene *GNB3* which encodes the  $\beta 3$  subunit of heterotrimeric G proteins is associated with enhanced signal transduction *via* G proteins through the generation of a splice variant termed *G $\beta 3$ s*. It was detected following a classical candidate gene approach using cell lines from patients with enhanced signal transduction and essential hypertension. The high frequency of the 825T allele in ‘old’ ethnicities, e.g. bushmen and Australian aborigines as well as in black populations, together with its strong association with obesity suggests that the 825T allele is a true ‘thrifty genotype’. Development of obesity associated with the 825T allele is strongly influenced by lifestyle, e.g. physical activity, and other exogenous influences like pregnancy. In hypertension the 825T allele is associated with low renin activity and appears to strongly predict the development of left ventricular hypertrophy. In type 2 diabetes the 825T allele was reported to be predispose for end-stage renal disease, whereas this effect has not yet been confirmed for patients with type 1 diabetes.

**Keywords:** cardiovascular disease, diabetes, hypertrophy, signal transduction, sodium

---

### Introduction

It is commonly accepted that essential hypertension (HT) which affects up to 30% of individuals in industrialized countries is a multifactorial, polygenetic disorder. The motivation to detect gene alterations causing or contributing to HT is driven by several promises of molecular medicine: Identification of involved loci will lead to a better understanding of the pathophysiological mechanisms leading to high blood pressure and, potentially, to the development of novel drugs for causal treatment. In addition, this will eventually result in the abolition of the term ‘essential’ HT and help to further stratify patients with HT in terms

of specific traits or phenotypes associated with a defined allelic variant or a combination of variants. Moreover, genetic tests could be an important tool for preventive medicine in that individuals at risk can be identified before blood pressure increases and eventually escape this ‘fate’ through the implementation of lifestyle changes. Genotyping for common polymorphisms may also help to predict side effects, potential risks or blood pressure-lowering efficacy of existing drugs. In patients with type-1 or type-2 diabetes genetic markers predictive for the development of nephropathy will be highly useful in risk stratification, the early initiation of optimal therapy, and will hopefully improve patient compliance.

A variety of polymorphisms associated with HT have already been found in the genes coding for angiotensinogen, angiotensin-converting enzyme,  $\alpha$ -adducin, and the  $\beta 2$ -adrenoceptor, to name but a few [1]. The present review will focus on the discovery of the C825T polymorphism in the gene encoding for the G protein  $\beta 3$  subunit (*GNB3*), evolution of the 825T allele, and its association with obesity and hypertension-related phenotypes.

### Enhanced Na/H exchanger activity in HT

Many independent studies have confirmed an increased Na/H exchanger (NHE) activity in a subset of patients with HT [2,3]. This ubiquitously expressed ion transport system mediates an electroneutral exchange of extracellular  $\text{Na}^+$  ions against intracellular  $\text{H}^+$  ions, thereby contributing to intracellular pH homeostasis and [4], potentially, to a rise of cytoplasmic pH following hormonal stimulation of cells [5]. In addition, NHE isoforms play a pivotal role in mediating  $\text{Na}^+$  reabsorption in the proximal tubule. Increased Na/H exchanger activity in HT was found in all cells and tissues examined including erythrocytes, leukocytes, platelets, and skeletal muscle [2,3]. This observation gave rise to two alternative hypothesis linking enhanced NHE activity to pathogenetic processes which could finally precipitate in hypertension. An increased NHE activity in the kidney could result in increased  $\text{Na}^+$  reabsorption and induce a state of

---

*Correspondence and offprint requests to:* Dr Winfried Siffert, Institut für Pharmakologie, Universitätsklinikum Essen, Hufelandstraße 55, D-45122 Essen, Germany.

volume expansion. In fact, Diez *et al.* observed an increased  $\text{Na}^+$  accumulation and suppressed renin concentrations in individuals with enhanced Na/H exchanger activity [6].

Alternatively, it was proposed that elevated NHE activity would efficiently prevent cells from acidosis during proliferation processes and might, therefore, contribute to vascular remodelling of resistance vessels frequently described as media hypertrophy [7]. This hypothesis was supported by findings showing an association between high NHE activity and left ventricular hypertrophy in individuals with HT [8,9]. Despite these highly reproducible findings and correlations the molecular mechanisms underlying enhanced NHE activity in HT remained obscure. Aviv's group postulated that enhanced NHE activity results from a primary disturbance in cellular  $\text{Ca}^{2+}$  homeostasis, a higher cytosolic  $\text{Ca}^{2+}$  in HT being causally related to enhanced NHE activity [10]. In fact, when thrombin-evoked cytosolic free  $\text{Ca}^{2+}$  and  $\text{pH}_i$  rises were compared in platelets from hypertensive and normotensive subjects, higher  $\text{pH}_i$  rises correlated with higher  $\text{Ca}^{2+}$  rises in HT [11]. Others claimed a major role for abnormalities in glucose metabolism, e.g. hyperinsulinaemia, in enhanced NHE activity. Insulin was found to stimulate the NHE in erythrocytes [12] and, *vice versa* enhanced NHE activity was found in overweight (potentially hyperinsulinaemic) but not lean subjects with HT [13]. Interestingly, antihypertensive treatment with the ACE inhibitor quinapril normalized NHE activity in lymphocytes suggesting again that this phenomenon occurred secondarily to metabolic and/or hormonal changes in HT [14].

In view of this plethora of open questions we decided to use a novel experimental approach in order to find out whether high NHE activity is a 'true' intermediate, i.e. inherited, phenotype in HT. To achieve this we immortalized lymphocytes from patients with HT and high NHE activity and from normotensive controls with low NHE activity using Epstein Barr virus. Thus, we established permanently growing lymphoblastoid cell lines which had never been exposed to the 'hypertensive *in vivo* milieu'. Such a model has frequently been used to dissect exogenous from inherited phenotypes in a variety of disorders. We could demonstrate that the phenotypes of low or high NHE activity persisted in these immortalized cell lines suggesting that this property was somehow under genetic control [15]. Furthermore, cells with high NHE activity proliferated faster and progressed faster through the cell cycle than those from individuals with low NHE activity [15,16].

Subsequently we sequenced the cDNA encoding for the NHE-1 from various cell lines but failed to detect any mutation [15]. Others used the same experimental setup and essentially confirmed our findings. It was shown that NHE expression was unaltered in immortalized lymphoblasts despite enhanced activity [17], whereas an increased phosphorylation of the ion exchanger correlated with enhanced activity. In line with these findings, the activity of the mitogen-

activated protein kinase was increased in these respective cell lines [18]. These findings together with an earlier report, showing that inhibitors of protein kinase C could normalize elevated NHE activity [19], led us to investigate whether signal transduction processes upstream of NHE activity control are altered in HT.

### From Na/H exchanger activity to G protein activation—the missing link

Using the established immortalized lymphoblasts we quantified platelet-activating factor (PAF)-mediated rises in cytosolic free  $\text{Ca}^{2+}$  and inositol phosphate formation and found a significantly increased formation of these second messengers in cells with high NHE activity [20]. PAF receptors in B-lymphoblastoid cell lines are coupled to heterotrimeric G proteins. On pretreatment of these cell lines with pertussis toxin (PTX), which allows to discriminate between the involvement of G proteins belonging to the  $G_s$ ,  $G_i/G_o$ , or  $G_{q/11}$  family, the originally observed differences in PAF-evoked  $\text{Ca}^{2+}$  signals were completely abrogated [20]. Moreover, agonist-stimulated binding of GTP to permeabilized lymphoblasts, indicative of G protein reactivity, was consistently enhanced in cells from subjects with HT [20]. These results strongly suggested an enhanced G protein activation as the ultimate reason for enhanced signal transduction, proliferation, and NHE activity in these immortalized cell lines. Studies on primary skin fibroblasts from the same individuals confirmed these findings [21]. In addition, as skin fibroblasts express receptors for hormones which are also relevant for the cardiovascular system we were able to identify more exactly the type of G protein responsible for enhanced cell responsiveness. On stimulation with agonists which activate receptors coupled to PTX-insensitive G proteins,  $G_{q/11}$ -coupled, e.g. bradykinin and endothelin-1, maximum  $\text{Ca}^{2+}$  signals were not significantly different in fibroblasts from individuals with HT and controls. However, on stimulation with agonists which at least in part activate PTX-sensitive G proteins, e.g. thrombin and *lyso*-phosphatidic acid,  $\text{Ca}^{2+}$  signals and inositol phosphate formation were significantly enhanced in cells from subjects with HT [21]. Interestingly, these differences were completely abrogated on pretreatment of cells with PTX. In accordance with the results obtained from lymphoblasts we observed an increased, PTX-sensitive DNA synthesis in fibroblasts from subjects with HT following stimulation of cells with serum, platelet-derived growth factor, or *lyso*-phosphatidic acid [21].

Taken together, these congruent findings in immortalized lymphoblasts as well as in primary skin fibroblasts strongly suggested an inherited increased activation of G proteins in cells from subjects with HT and also made it very likely that specifically PTX-sensitive G-proteins were involved.

## Structure and function of heterotrimeric G proteins—the G protein activation/deactivation cycle

Heterotrimeric G proteins are ubiquitously expressed mediators of stimuli from heptahelical receptors, but also receptors with intrinsic tyrosine kinase activity (insulin, platelet-derived growth factor, epidermal growth factor), into all cells of the human body [22]. They are composed of  $\alpha$ -,  $\beta$ - and  $\gamma$ -subunits,  $\beta\gamma$  dimers forming a functional monomer. In the non-activated state G protein  $\alpha$ -subunits bind GDP (Fig. 1), which upon interaction of the  $\alpha$ -subunit with an activated receptor is released in exchange for GTP. GDP release and GTP binding are the steps which initiate G protein activation. Subsequently, G protein  $\alpha$ - and  $\beta\gamma$ -subunits dissociate and both  $\alpha$ - and  $\beta\gamma$ -subunits can activate a plethora of effectors e.g. ion channels, phospholipase C, the MAP-kinase pathway, the adenylyl cyclase system, which ultimately results in a cellular response, e.g. hormone secretion, contraction, proliferation, etc. [23].

G protein activation is terminated through the intrinsic GTPase activity of the  $\alpha$ -subunit which hydrolyzes bound GTP to GDP. Following this step, G protein  $\alpha$ - and  $\beta\gamma$ -subunits re-associate and are available for a new activation cycle through a G protein-coupled receptor. There exists a huge variety of different  $\alpha$ -subunit isoforms, 5  $\beta$ -subunits, and 13  $\gamma$ -subunits encoded by different genes, which not only differ with regard to their molecular properties but also their tissue-specific expression [24]. For example, the G protein  $\alpha$ -subunits  $G\alpha_{i2}$ ,  $G\alpha_{i3}$ ,  $G\alpha_{q/11}$ , and  $G\alpha_s$  are widely expressed, whereas  $G\alpha_{15/16}$  appear confined to haematopoietic cells, and  $G\alpha_o$  is predominantly expressed in neuronal tissues. The  $\beta_1$ -,  $\beta_2$ - and

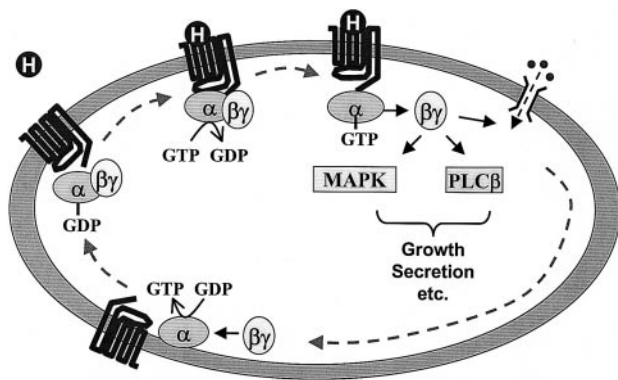

**Fig. 1.** The G protein activation—deactivation cycle heterotrimeric G proteins consist of  $\alpha$ - and  $\beta\gamma$ -subunits. In the resting state, GDP is bound to the  $\alpha$ -subunit. On receptor activation by a hormone (H), the receptor undergoes a conformational change, interacts with the G protein, and the  $\alpha$ -subunit exchanges GDP for GTP. The  $\alpha$ - and  $\beta\gamma$ -subunits dissociate and can then interact with a variety of targets like ion channels, phospholipase C $\beta$  (PLC $\beta$ ) isoforms or the mitogen-activated protein kinase (MAPK) pathway. This finally results in a specific cellular function or response. G protein activation is terminated through the hydrolysis of GTP to GDP and re-association of the  $\beta\gamma$  dimer with the  $\alpha$ -subunit.

$\beta_3$ -subunits are widely distributed, whereas the expression pattern of  $\beta_4$  is not very well known and  $\beta_5$  is confined to the brain. The different  $\gamma$ -subunits can not freely combine with any of the five  $\beta$ -subunits suggesting a selective preference of certain  $\gamma$ -subunits for specific  $\beta$ -isoforms [25,26]. Receptor selectivity of G protein  $\alpha$ -subunits is obviously obtained through their differential association with specific  $\beta\gamma$ -subunit combinations [27–29].

Activation of G proteins can be quantified in isolated cell membranes or permeabilized cells by different experimental approaches. One technique consists of using a radioactive, non-hydrolyzable GTP analog like GTP $\gamma$ S which upon receptor activation combines with  $\alpha$ -subunits and forms a rather stable complex as it is not hydrolyzed by the intrinsic GTPase activity of the  $\alpha$ -subunit [30]. Thus, quantification of radioactive GTP $\gamma$ S bound to activated  $\alpha$ -subunits is a technically simple way of quantifying G protein activation.

Although the described experiments argued in favour of a molecular alteration in G protein subunits as the major reason for increased signal transduction in cells from subjects with HT. However, the molecular nature of this alteration was unpredictable and, even worse, these functionally studies did not provide any clues as to whether these alterations had to be searched in  $\alpha$ - or  $\beta\gamma$ -subunits. At least, through Western blot analysis an overexpression of G protein  $\alpha$ -subunits could be ruled out. Therefore, we systematically sequenced cDNAs encoding for different G protein  $\alpha$ - and  $\beta$ -subunits from cell lines with ‘normal’ and ‘enhanced’ signal transduction.

## The G protein $\beta_3$ subunit gene (*GNB3*) and the C825T polymorphism.

Since mutations in the G protein  $\alpha$  subunits  $G\alpha_{i2}$ ,  $G\alpha_{i3}$ ,  $\beta_1$ , and  $\beta_2$  had been ruled out [21] we sequenced the cDNA encoding for  $G\beta_3$ . The coding gene (*GNB3*) is located on chromosome 12p13 and the  $\beta_3$  protein has been reported to be ubiquitously expressed [31]. The gene consists of 11 exons, the start codon ATG being located in exon 3 and the stop codon TGA in exon 11 (Fig. 2). We detected in all cell lines with increased G protein activation the nucleotide T at position 825 of the cDNA although the published cDNA sequence [32] reported the nucleotide C at this respective position. All cell lines with low G protein reactivity were derived from homozygous C825 allele carriers. Originally this finding was rather confusing as the C825T exchange does not change the encoded amino acid (serine). Subsequently we observed that all individuals with a 825T allele expressed a truncated splice variant of  $G\beta_3$ , termed  $G\beta_3s$ , through a mechanism that remains to be completely understood [33]. Alternative splicing of the gene occurs through the use of a cryptic splice site located within exon 9 (Fig. 2), which is apparently activated in individuals carrying the 825T allele. Thus, 825T allele carriers express two gene products from *GNB3*, the ‘wild-type’ protein and

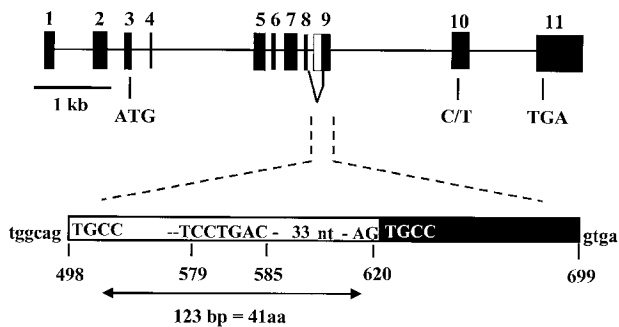

**Fig. 2.** Structure of *GNB3*. The gene encoding the  $\beta 3$ -subunit of heterotrimeric G proteins consists of 11 exons, the start codon ATG being located in exon 3 and the stop codon TGA in exon 11. The C825T polymorphism is located within exon 10. Both a regularly but also an alternatively spliced  $G\beta 3$  mRNA is observed in 825T allele carriers. The C-T transition in exon 10 supports alternative splicing of exon 9 through the use of a cryptic splice site located in exon 9 (cDNA position 620). The alternatively spliced mRNA displays a deletion of 123 nucleotides corresponding to 41 amino acids. For further details see reference [33].

a truncated protein ( $G\beta 3s$ ) in which 41 amino acids are deleted. The potential structures of  $G\beta 3$  and  $G\beta 3s$  differ markedly (Fig. 3). G protein  $\beta$ -subunits belong to the family of so called WD-repeat proteins which form a propeller-like structure [34,35]. The N-terminal part of the protein interacts with  $G\gamma$  subunits. The WD repeats of  $G\beta$ -subunits contribute to the formation of a  $\beta$  propeller with seven propeller blades [36]. The in-frame deletion described in  $G\beta 3s$  results in the loss of one propeller blade thus giving rise to a protein with 6 propeller blades only (Fig. 3). Nevertheless this truncated  $G\beta 3s$  protein can function properly in G proteins consisting of  $G\alpha_{i2}$  and  $G\gamma_5$  [33]. Moreover, when  $G\beta 3s$  is transfected into COS-7 cells an increased chemotaxis is observed [37], this processing being known to be mediated by G protein  $\beta\gamma$ -subunits [38].

Thus, starting from an exquisitely characterized phenotype, namely enhanced G protein reactivity in selected patients with HT, we could identify a gene alteration closely associated with this phenotype. Moreover, we could clone a novel  $G\beta 3$  cDNA which upon transfection in suitable cells completely restores the originally observed phenotype. It must be noted, however, that we do not yet know how a remote polymorphism can affect alternative splicing of *GNB3*. Additional mutations in exons of *GNB3* have been ruled out. Nevertheless, the possibility remains open that mutations in the intron located between exons 9 and 10 (Fig. 2) which could be in tight linkage equilibrium with the 825T allele are responsible for alternative splicing.

#### Ethnic distribution of the 825T allele is in accordance with the 'thrifty genotype hypothesis'

The thrifty genotype hypothesis originally set up by Neel [39], and extended by others [40], in principle proposes that certain genes enhancing salt retention or

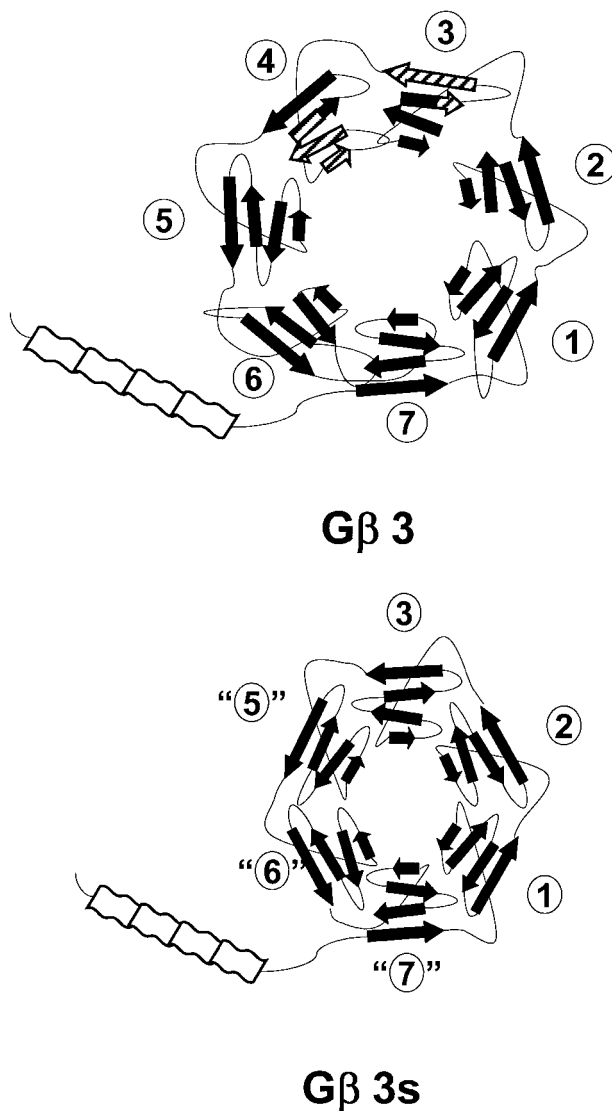

**Fig. 3.** Proposed structures of  $G\beta 3$  and  $G\beta 3s$ .  $G\beta$ -subunits form a propeller-like structure with seven so-called propeller blades (top). The deletion resulting in the generation of  $G\beta 3s$  is indicated (hatched background; top). This results in a novel  $G\beta 3$  protein with only 6 propeller blades (bottom).

fat accumulation might have been crucial for the survival of our hunter/gatherer ancestors but may become detrimental in Westernized societies with an unrestricted access to food and salt in combination with a sedentary lifestyle characterized by a lack of physical activity. To study whether the 825T allele could represent such a thrifty genotype we conducted a world-wide co-operative study to determine the frequency of the 825T allele in different ethnicities and in non-human primates [41]. The 825T allele was absent in all non-human primates examined including chimpanzees, orangutan, and gorilla. However, relatively high frequencies of the 825T allele were found in 'old' populations such as bushmen, pygmies, and aborigines from Australia and Papua New Guinea [41]. Highest 825T allele frequencies in the range of 80–90% were

determined in all black African populations as well as in black Americans (Fig. 4). Intermediate 825T allele frequencies in the range of 40–60% are found in East Asia (Japan, Korea, China), in some American Indian tribes and in the Saudi Arabian population. Lowest 825T allele frequencies are present in Caucasian populations and average 30%. These findings have some important implications. The geographic distribution of the 825T allele is fully compatible with the 'Out-of-Africa' hypothesis of modern humans [42]. Moreover, the high 825T allele frequencies in blacks and in Australian aborigines may explain why individuals from these ethnicities are especially prone to the development of obesity and hypertension upon abandoning their original life style, moving to big cities and adopting the typical Westernized way of life [43–47].

### 825T allele and hypertension—weak or strong association?

Independent case-control and population-based studies in Caucasians have demonstrated an association of the 825T allele with hypertension, the odds ratios for homozygous 825T allele carriers *versus* homozygous C825 allele carriers being in the range of 1.8–2 [33,48,49]. In the study by Brand *et al.* no such association was found [50]. However, this was obviously due to a misclassification of normotensive controls which included subjects with borderline hypertension, i.e. diastolic blood pressure values between 90 and 94 mm Hg. A stronger association with HT and higher risk associated with a homozygous 825T allele status was reported for blacks living in the UK with odds ratios for HT in the range of 4 [51]. Similarly, high odds ratios for HT associated with the 825T allele were reported for Caucasians with a strong family history of HT [52].

It should be noted that such genetic case-control studies are not very much informative given that HT is a weak phenotype which can result from multiple hormonal and/or cellular alterations. For example, Bianchi's group has been able to demonstrate that a common polymorphism in  $\alpha$ -adducin may not always track with hypertension in association studies, but consistently indicates an enhanced responsiveness of subjects with HT to diuretics [53]. Therefore, it is clinically much more relevant to describe in detail additional phenotypes and risks associated with a certain gene alteration in subjects with HT rather than to repeat association studies which naturally will yield low odds ratios. In the case of the 825T allele these hypertension-associated phenotypes can be easily predicted. The phenotypes associated with high NHE activity have been fairly well characterized in the past and include obesity [13], salt retention and low plasma renin activity [6], as well as left ventricular hypertrophy (LVH) [9]. As enhanced NHE activity is ultimately caused by enhanced G protein activation indicated by the 825T allele it must be expected that these above mentioned traits should strongly accumulate in 825T allele carriers. In fact, independent studies have already shown an association of the 825T allele with obesity in different populations (see below). Likewise, Schunkert *et al.* described a significantly reduced renin activity in subjects carrying a 825T allele [49], suggesting that the 825T allele is associated with 'low renin hypertension'. A recent report indicates a highly increased frequency of the 825T allele in hypertensive subjects with LVH [54]. If the reported results were representative, homozygous and heterozygous 825T allele carriers have a 6-fold and 3.4-fold, respectively, increased risk for LVH.

It is expected that upcoming reports will provide further insights into the hypertensive phenotypes associated with the 825T allele and potentially lead to the

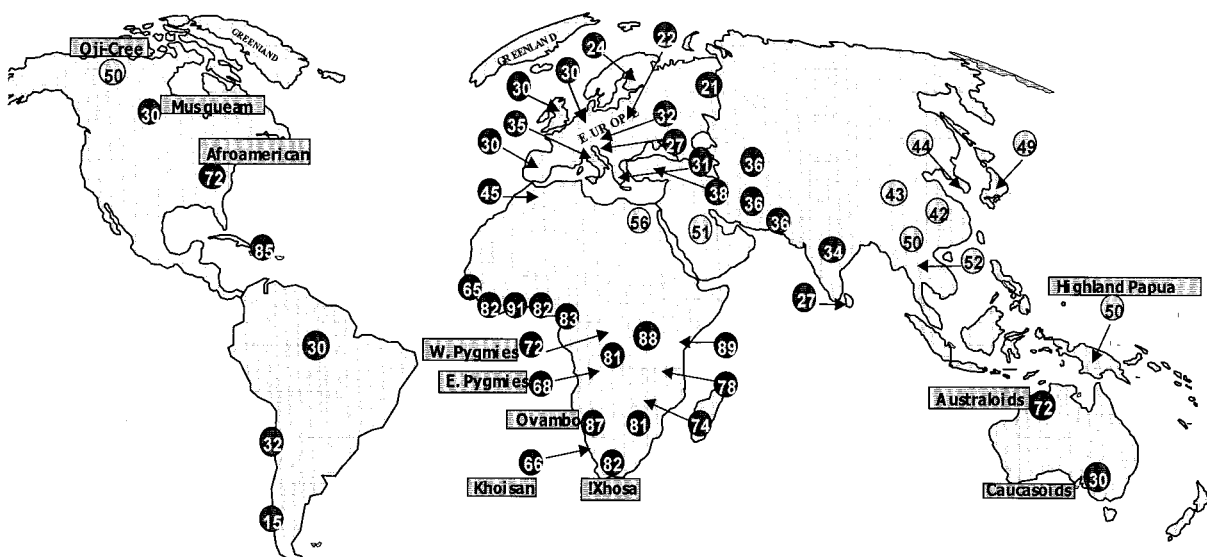

Fig. 4. Worldwide distribution of the 825T allele. Figures are 825T allele frequencies (%). See the text and ref. [41] for further details.

definition of a well described entity in 'essential' hypertension, i.e. 'G protein hypertension'. For this hypothetical disorder, odds ratios associated with the 825T allele can be expected to be remarkably high.

### 825T allele and obesity

Although the cellular phenotype associated with the 825T allele—enhanced G protein activation—is exquisitely well understood, the pathogenetic mechanisms linking increased intracellular signal transduction to the development of high blood pressure remain to be understood. That this mechanism may be rather complex is nicely illustrated by a genetic association study conducted in the Canadian Oji-Cree. In that population-based study the 825T allele was associated with lower rather than increased blood pressure values except in hypertensive individuals in which highest 825T allele frequencies were observed [55]. This latter effect failed to reach statistical significance due to the low number of individuals with HT in the study group. Likewise, others found no association of the 825T allele with HT in Japanese individuals using a case-control study design [56]. On a first glance these apparently contradictory observations are confusing and may give rise to several interpretations and speculations. The predisposing effect of enhanced G protein activation for HT might be restricted to Caucasians due to the fact that genetic background differs drastically from Japanese and Canadian Indians. This argument of heterogeneity of genetic background is frequently used when a lack of association of a single genetic marker with a trait is reported, but what exactly this term describes is hardly defined. In the context of the 825T allele such an assumption appears not supported by published data because a strong association with HT was reported for blacks [57] and a convincing trend for increased 825T allele frequency was seen in Canadian Indians with HT [55]. On the other hand, the 825T allele may become detrimental only in conjunction with specific environmental or behavioral factors, e.g. a certain nutritional patterns or lack of physical exercise. Such an effect was recently shown for a common polymorphism in the gene encoding the  $\beta 2$ -adrenoceptor which exerts no effect on body mass index in individuals with regular physical activity but is significantly associated with obesity in individuals who do not exercise regularly [58].

G proteins have been shown to play a key role in adipogenesis. Expression of constitutively active  $G_{\alpha i}$ -subunits or overexpression of  $G_{\alpha i}$ -subunits in stem cells induces an adipogenic conversion [59]. Vice versa, animals in which  $G_{\alpha i 2}$  is knocked out are runted and display reduced fat mass [60]. Since the 825T allele predicts enhanced G protein activation, especially of PTX-sensitive G proteins, we investigated whether 825T allele carriers have an increased risk of obesity. A strong association with obesity was found in subjects with HT, odds ratios for homozygous 825T allele carriers being in the range of 3 [61]. A significant

association of the 825T allele with increased body mass index was independently observed in young German males, young Chinese, and young black African individuals from Zimbabwe and South Africa [41]. This latter study also demonstrated the enormous contribution of non-genetic factors to obesity. Young blacks from Zimbabwe displayed a high 825T allele frequency in the range of 80%. However, an effect of the 825T allele on body mass index was exclusively observed in individuals living in Zimbabwe's capital, Harare, whereas no such effect was seen in individuals from rural Zimbabwe despite an identical 825T allele frequency [41]. This again underscores that lifestyle plus genetic predisposition are required for a susceptibility gene to exert its effect on a highly variable trait such as obesity and stays in line with the observation that urbanization is a major risk factor for obesity and hypertension in the African community [45–47]. In a different study design we investigated genetic and non-genetic factors predisposing young healthy Caucasian women for obesity. We observed a strong risk for obesity in homozygous 825T allele carriers following their first pregnancy which was completely counteracted by regular physical exercise [62]. Again, this study highlights the importance of thoroughly characterizing individuals in terms of non-genetic influences when an association between a single allele and a highly variable trait is examined.

Finally, it should be mentioned here that the association between the 825T allele and increased body fat was recently confirmed in Canadian Inuit [63].

Taken together, it seems that the association between the 825T allele and obesity could be much stronger than that seen with hypertension, at least if unselected individuals not further characterized in terms of specific hypertensive phenotypes are investigated. Nevertheless, such an association would explain why the 825T allele is associated with late-onset rather than early HT [33]. Potentially, HT associated with the 825T allele results from a combination of hyperinsulinaemia and increased sympathetic tone which could also explain  $\text{Na}^+$  retention and low renin in hypertensive subjects carrying a 825T allele.

### 825T allele and diabetic nephropathy

Several considerations lead to the hypothesis that the 825T allele should be a good genetic marker for the prediction of onset of nephropathy in both type 1 and type 2 diabetes. As described above, the cellular phenotypes ultimately leading to the identification of the C825T polymorphism in *GNB3* were enhanced NHE activity, increased intracellular signal transduction, and enhanced G protein reactivity. The same cellular phenotypes have been described to be associated with nephropathy in type 1 and type 2 diabetes.

Enhanced NHE activity has been demonstrated in platelets [64], erythrocytes [65], leukocytes [66], and skin fibroblasts [67] from patients with type 1 diabetes and nephropathy. Like in HT, this enhanced NHE

activity is preserved in immortalized cells [68,69] and associated with an increased proliferation [67,68]. These abnormalities appear to be caused by enhanced G protein activation especially in patients with both nephropathy and hypertension [70]. Likewise, cultured fibroblasts from patients with type 2 diabetes display enhanced NHE activity [71], as well as increased rises of cytosolic pH and cytosolic free calcium on stimulation with insulin or angiotensin II [72,73]. Finally, as hypertension or a family history of hypertension or cardiovascular events are major risk factors for the development of nephropathy [74], an association of nephropathy with the 825T allele appears more than likely. Blüthner *et al.* in fact found a significantly increased frequency of the 825T allele (36.2%) in dialyzed patients with type 2 diabetes as compared to patients without microangiopathy (825T allele frequency = 28.6%). Using the published figures one can calculate an odds ratio of 11.8 for homozygous 825T allele carriers *versus* homozygous 825C allele carriers for end-stage renal disease [75]. Future studies will have to confirm these findings preferentially in a prospective study design.

For type 1 diabetes the issue remains to be settled. Fogarty *et al.* described similar 825T allele frequencies in patients with type 1 diabetes with or without nephropathy [76]. It should be emphasized, however, that 66 of 216 patients with nephropathy in their study sample suffered from end-stage renal disease. In addition, patients with nephropathy had significantly longer duration of diabetes, higher values of HbA<sub>1c</sub>, and the number of patients with hypertension was significantly increased compared to the non-nephropathic group. Unfortunately, genotype distribution for the group of patients displaying simultaneously with nephropathy and hypertension was not given. Such studies can be severely confounded by a survivor effect associated with the C825 allele if a patient group with nephropathy comprises individuals with end-stage renal failure on dialysis. It was reported that the 825T allele is associated with an increased mortality in dialysis patients [77].

Again, prospective studies or appropriate retrospective studies are required to resolve the question whether or not the 825T allele is associated with nephropathy in patients with type 1 diabetes. The notion should be kept in mind, that a single nucleotide polymorphism may more likely predict *when* rather than *whether* a diabetic patient will develop nephropathy.

## References

- Luft FC. Molecular genetics of human hypertension. *J Hypertens* 1998; 16: 1871–1878
- Roszkopf D, Düsing R, Siffert W. Membrane sodium-proton exchange and primary hypertension. *Hypertension* 1993; 21: 607–617
- Siffert W, Düsing R. Sodium-proton exchange and primary hypertension—an update. *Hypertension* 1995; 26: 649–655
- Mahnensmith RL, Aronson PS. The plasma membrane sodium-hydrogen exchanger and its role in physiological and pathophysiological processes. *Circ Res* 1985; 56: 773–788
- Grinstein S, Rotin D, Mason M. Na<sup>+</sup>/H<sup>+</sup> exchange and growth factor-induced cytosolic pH changes. Role in cellular proliferation. *Biochim Biophys Acta* 1989; 988: 73–97
- Diez J, Alonso A, Garcandia A *et al.* Association of increased erythrocyte Na<sup>+</sup>/H<sup>+</sup> exchanger with renal Na<sup>+</sup> retention in patients with essential hypertension. *Am J Hypertens* 1995; 8: 124–132
- Düsing R, Göbel B, Weißer B, Dittrich D, Kraemer S, Vetter H. Mechanismus und Bedeutung der arteriellen Media-Hypertrophie/Hyperplasie bei der arteriellen Hypertonie. Rolle des Na<sup>+</sup>/H<sup>+</sup>-Antiports. *Klein Wochenschr* 1988; 66: 1151–1159
- Navarro-Lopez F, Coca A, Pare JC, de La SA, Bosch X, Urbano MA. Left ventricular hypertrophy in asymptomatic essential hypertension: its relationship with aldosterone and the increase in sodium-proton exchanger activity. *Eur Heart J* 1993; 14 Suppl J: 38–41
- de La SA, Coca A, Pare JC, Sanchez M, Valls V, Urbano-Marquez A. Erythrocyte ion fluxes in essential hypertensive patients with left ventricular hypertrophy. *Circulation* 1993; 88: 1628–1633
- Aviv A. The links between cellular Ca<sup>2+</sup> and Na<sup>+</sup>/H<sup>+</sup> exchange in the pathophysiology of essential hypertension. *Am J Hypertens* 1996; 9: 703–707
- Poch E, Botey A, Gaya J, Darnell A, Rivera F, Revert L. Intracellular calcium concentration and activation of the Na<sup>+</sup>/H<sup>+</sup> exchanger in essential hypertension. *Kidney Int* 1994; 45: 1037–1043
- Ceolotto G, Conlin P, Clari G, Semplicini A, Canessa M. Protein kinase C and insulin regulation of red blood cell Na<sup>+</sup>/H<sup>+</sup> exchange. *Am J Physiol* 1997; 272: C818–C826
- Delva P, Pastori C, Provoli E *et al.* Erythrocyte Na<sup>+</sup>-H<sup>+</sup> exchange activity in essential hypertensive and obese patients: Role of excess body weight. *J Hypertens* 1993; 11: 823–830
- Fortuno A, Tisaire J, Lopez R, Bueno J, Diez J. Angiotensin converting enzyme inhibition corrects Na<sup>+</sup>/H<sup>+</sup> exchanger overactivity in essential hypertension. *Am J Hypertens* 1997; 10: 84–93
- Roszkopf D, Frömter E, Siffert W. Hypertensive sodium-proton exchanger phenotype persists in immortalized lymphoblasts from essential hypertensive patients—a cell culture model for human hypertension. *J Clin Invest* 1993; 92: 2553–2559
- Roszkopf D, Schröder K-J, Siffert W. Role of sodium-hydrogen exchange in the proliferation of immortalised lymphoblasts from patients with essential hypertension and normotensive subjects. *Cardiovasc Res* 1995; 29: 254–259
- Ng LL, Sweeney FP, Siczkowski M *et al.* Na<sup>+</sup>/H<sup>+</sup> antiporter phenotype, abundance, and phosphorylation of immortalized lymphoblasts from humans with hypertension. *Hypertension* 1995; 25: 971–977
- Sweeney FP, Quinn PA, Ng LL. Enhanced mitogen-activated protein kinase activity and phosphorylation of the Na<sup>+</sup>/H<sup>+</sup> exchanger isoform-1 of human lymphoblasts in hypertension. *Metabolism* 1997; 46: 297–302
- Livne AA, Aharonovitz O, Paran E. Higher Na<sup>+</sup>-H<sup>+</sup> exchange rate and more alkaline intracellular pH set-point in essential hypertension: Effects of protein kinase modulation in platelets. *J Hypertens* 1991; 9: 1013–1019
- Siffert W, Roszkopf D, Moritz A *et al.* Enhanced G protein activation in immortalized lymphoblasts from patients with essential hypertension. *J Clin Invest* 1995; 96: 759–766
- Pietruck F, Moritz A, Montemurro M *et al.* Selectively enhanced cellular signalling by G<sub>i</sub> proteins in essential hypertension. G<sub>α</sub><sub>12</sub>, G<sub>α</sub><sub>13</sub>, G<sub>β</sub><sub>1</sub> and G<sub>β</sub><sub>2</sub> are not mutated. *Circ Res* 1996; 79: 974–983
- Bourne HR. How receptors talk to trimeric G proteins. *Curr Opin Cell Biol* 1997; 9: 134–142
- Gautam N, Downes GB, Yan K, Kisselev O. The G-protein betagamma complex. *Cell Signal* 1998; 10: 447–455
- Offermanns S, Schultz G. Complex information processing by the transmembrane signaling system involving G proteins. *Naunyn Schmiedebergs Arch Pharmacol* 1994; 350: 329–338
- Ueda N, Iñiguez-Lluhi JA, Lee E, Smrcka AV, Robishaw JD, Gilman AG. G protein βγ subunits. Simplified purification and properties of novel isoforms. *J Biol Chem* 1994; 269: 4388–4395
- Pronin AN, Gautam N. Interaction between G-protein β and γ

- subunit types is selective. *Proc Natl Acad Sci USA* 1992; 89: 6220–6224
27. Kleuss C, Scherübl H, Hescheler J, Schultz G, Wittig B. Selectivity in signal transduction determined by gamma subunits of heterotrimeric G proteins. *Science* 1993; 259: 832–834
  28. Kleuss C, Scherübl H, Hescheler J, Schultz G, Wittig B. Different  $\beta$ -subunits determine G-protein interaction with transmembrane receptors. *Nature* 1992; 358: 424–426
  29. Kleuss C, Hescheler J, Ewel C, Rosenthal W, Schultz G, Wittig B. Assignment of G-protein subtypes to specific receptors inducing inhibition of calcium currents. *Nature* 1991; 353: 43–48
  30. Wieland T, Liedel K, Kaldenberg-Stasch S, Meyer zu Heringdorf D, Schmidt M, Jakobs KH. Analysis of receptor-G protein interactions in permeabilized cells. *Naunyn Schmiedebergs Arch Pharmacol* 1995; 351: 329–336
  31. Ansari-Lari MA, Muzny DM, Lu J *et al.* A gene-rich cluster between the CD4 and triosephosphate isomerase genes at human chromosome 12p13. *Genome Res* 1996; 6: 314–326
  32. Levine MA, Smallwood PM, Moen PT, Jr., Helman LJ, Ahn TG. Molecular cloning of beta 3 subunit, a third form of the G protein beta-subunit polypeptide. *Proc Natl Acad Sci USA* 1990; 87: 2329–2333
  33. Siffert W, Roszkopf D, Siffert G *et al.* Association of a human G-protein beta3 subunit variant with hypertension. *Nature Genet* 1998; 18: 45–48
  34. Neer EJ, Smith TF. G protein heterodimers: New structures propel new questions. *Cell* 1996; 84: 175–178
  35. Farfel Z, Bourne HR, Iiri T. The expanding spectrum of G protein diseases. *N Engl J Med* 1999; 340: 1012–1020
  36. Sondek J, Bohm A, Lambright DG, Hamm HE, Sigler PB. Crystal structure of a  $G_A$  protein  $\beta\gamma$  dimer at 2.1Å resolution. *Nature* 1996; 379: 369–374
  37. Virchow S, Ansoerge N, Roszkopf D, Rübber H, Siffert W. The G protein  $\beta 3$  subunit splice variant  $G\beta 3-s$  causes enhanced chemotaxis of human neutrophils in response to interleukin-8. *Naunyn Schmiedebergs Arch Pharmacol* 1999; 360: 27–32
  38. Neptune ER, Bourne HR. Receptors induce chemotaxis by releasing the  $\beta\gamma$  subunit of Gi, not by activating Gq or Gs. *Proc Natl Acad Sci USA* 1997; 94: 14489–14494
  39. Neel JV. Diabetes mellitus: a thrifty genotype rendered detrimental by progress? *Am J Hum Genet* 1962; 14: 353–362
  40. Sharma AM. The thrifty-genotype hypothesis and its implications for the study of complex genetic disorders in man. *J Mol Med* 1998; 76: 568–571
  41. Siffert W, Forster P, Jöckel K-H *et al.* Worldwide ethnic distribution of the G protein beta3 subunit 825T allele and its association with obesity in Caucasian, Chinese, and Black African individuals. *J Am Soc Nephrol* 1999; 10: 1921–1930
  42. Tishkoff SA, Dietzsch E, Speed W *et al.* Global patterns of linkage disequilibrium at the CD4 locus and modern human origins. *Science* 1996; 271: 1380–1387
  43. Gracey M: New World syndrome in Western Australian aborigines. *Clin Exp Pharmacol Physiol* 1995; 22: 220–225
  44. Luke A, Durazo-Arvizu R, Rotimi C *et al.* Relation between body mass index and body fat in black population samples from Nigeria, Jamaica, and the United States. *Am J Epidemiol* 1997; 145: 620–628
  45. Cooper R, Rotimi C, Ataman S *et al.* The prevalence of hypertension in seven populations of west African origin. *Am J Public Health* 1997; 87: 160–168
  46. Kaufman JS, Durazo-Arvizu RA, Rotimi CN *et al.* Obesity and hypertension prevalence in populations of African origin. The Investigators of the International Collaborative Study on Hypertension in Blacks. *Epidemiology* 1996; 7: 398–405
  47. Kaufman JS, Owoaje EE, James SA, Rotimi CN, Cooper RS. Determinants of hypertension in West Africa: Contribution of anthropometric and dietary factors to urban-rural and socioeconomic gradients. *Am J Epidemiol* 1996; 143: 1203–1218
  48. Beige J, Hohenbleicher H, Distler A, Sharma AM. G-Protein beta3 Subunit C825T Variant and Ambulatory Blood Pressure in Essential Hypertension. *Hypertension* 1999; 33: 1049–1051
  49. Schunkert H, Hense HW, Döring A, Rieger GAJ, Siffert W. Association between a polymorphism in the G protein  $\beta 3$  subunit gene and lower renin and elevated diastolic blood pressure. *Hypertension* 1998; 32: 510–513
  50. Brand E, Herrmann SM, Nicaud V *et al.* The 825C/T polymorphism of the G-protein subunit  $\beta 3$  is not related to hypertension. *Hypertension* 1999; 33: 1175–1178
  51. Dong Y, Zhu H, Sagnella GA, Carter ND, Cook D, Cappuccio FP. Association between the C825T polymorphism of the G protein  $\beta 3$ -subunit gene and hypertension in blacks. *Hypertension* 1999; 34: 1193–1196
  52. Benjafield AV, Jeyasingam CL, Nyholt DR, Griffiths LR, Morris BJ: G-Protein beta3 Subunit Gene (GNB3) Variant in Causation of Essential Hypertension. *Hypertension* 1998; 32: 1094–1097
  53. Glorioso N, Manunta P, Filigheddu F *et al.* The Role of alpha-Adducin Polymorphism in Blood Pressure and Sodium Handling Regulation May Not Be Excluded by a Negative Association Study. *Hypertension* 1999; 34: 649–654
  54. Poch E, Gonzalez D, Gomez-Angelats E *et al.* G-Protein beta(3) subunit gene variant and left ventricular hypertrophy in essential hypertension. *Hypertension* 2000; 35: 214–218
  55. Hegele RA, Harris SB, Hanley AJ, Cao H, Zinman B. G Protein  $\beta 3$  Subunit Gene Variant and Blood Pressure Variation in Canadian Oji-Cree. *Hypertension* 1998; 32: 688–692
  56. Kato N, Sugiyama T, Morita H, Kurihara H, Yamori Y, Yazaki Y. G protein beta3 subunit variant and essential hypertension in Japanese. *Hypertension* 1998; 32: 935–938
  57. Dong Y, Zhu H, Sagnella GA, Carter ND, Cook DG, Cappuccio FP. Association Between the C825T Polymorphism of the G Protein beta3- Subunit Gene and Hypertension in Blacks. *Hypertension* 1999; 34: 1193–1196
  58. Meirhaeghe A, Helbecque N, Cottel D, Amouyel P.  $\beta 2$ -adrenoceptor gene polymorphism, body weight, and physical activity. *Lancet* 1999; 353: 896
  59. Su HL, Malbon CC, Wang HY. Increased expression of Gi alpha 2 in mouse embryo stem cells promotes terminal differentiation to adipocytes. *Am J Physiol* 1993; 265: C1729–C1735
  60. Moxham CM, Hod Y, Malbon CC. Induction of  $G\alpha_{i2}$ -specific antisense RNA in vivo inhibits neonatal growth. *Science* 1993; 260: 991–995
  61. Siffert W, Naber C, Walla M, Ritz E. G protein  $\beta 3$  subunit 825T allele and its potential association with obesity in hypertensive subjects. *J Hypertens* 1999; 17: 1095–1098
  62. Gutersohn A, Naber C, Müller N, Erbel R, Siffert W. G protein beta3 subunit 825TT genotype and post pregnancy weight retention in young healthy women. *Lancet* 2000; 355: 1240–1241
  63. Hegele RA, Anderson C, Young TK, Connelly PW. G-protein beta3 Subunit Gene Splice Variant and Body Fat Distribution in Nunavut Inuit. *Genome Res* 1999; 9: 972–977
  64. Düsing R, Sorger M, Mattes L *et al.* Platelet  $Na^+/H^+$  antiport activity in patients with insulin-dependent diabetes mellitus with and without diabetic nephropathy. *Clin Invest* 1993; 71: 119–125
  65. Semplicini A, Lusiani L, Marzola M *et al.* Erythrocyte  $Li^+/Na^+$  and  $Na^+/H^+$  exchange, cardiac anatomy and function in insulin-dependent diabetics. *Eur J Clin Invest* 1992; 22: 254–259
  66. Ng LL, Simmons D, Frighi V, Garrido MC, Bomford J, Hockaday TDR. Leucocyte  $Na^+/H^+$  antiport activity in Type 1 (insulin-dependent) diabetic patients with nephropathy. *Diabetologia* 1990; 33: 371–377
  67. Lurbe A, Fioretto P, Mauer M, LaPointe MS, Battl D. Growth phenotype of cultured skin fibroblasts from IDDM patients with and without nephropathy and overactivity of the  $Na^+/H^+$  antiporter. *Kidney Int* 1996; 50: 1684–1693
  68. Sweeney FP, Siczkowski M, Davies JE *et al.* Phosphorylation and activity of  $Na^+/H^+$  exchanger isoform 1 of immortalized lymphoblasts in diabetic nephropathy. *Diabetes* 1995; 44: 1180–1185
  69. Ng LL, Davies JE, Siczkowski M *et al.* Abnormal  $Na^+/H^+$  antiporter phenotype and turnover of immortalized lymphoblasts from type 1 diabetic patients with nephropathy. *J Clin Invest* 1994; 93: 2750–2757
  70. Pietruck F, Spleiter S, Daul A *et al.* Enhanced G protein activation in IDDM patients with diabetic nephropathy. *Diabetologia* 1998; 41: 94–100
  71. Trevisan R, Cipollina MR, Duner E, Trevisan M, Nosadini R.



- Abnormal  $\text{Na}^+/\text{H}^+$  antiport activity in cultured fibroblasts from NIDDM patients with hypertension and microalbuminuria. *Diabetologia* 1996; 39: 717–724
72. Trevisan R, Duner E, Cipollina MR, Di Virgilio F, Trevisan M, Nosadini R. Enhanced effects of insulin and angiotensin II on intracellular pH and free cytosolic calcium in fibroblasts from microalbuminuric patients with non-insulin dependent diabetes mellitus. *Clin Sci* 1996; 91: 703–710
73. Duner E, Di Virgilio F, Trevisan R, Cipollina MR, Crepaldi G, Nosadini R. Intracellular free calcium abnormalities in fibroblasts from non-insulin-dependent diabetic patients with and without arterial hypertension. *Hypertension* 1997; 29: 1007–1013
74. Ritz E, Orth SR. Nephropathy in patients with type 2 diabetes mellitus. *N Engl J Med* 1999; 341: 1127–1133
75. Blüthner M, Schmidt S, Siffert W, Knigge H, Nawroth P, Ritz E. Increased frequency of G-protein beta 3-subunit 825 T allele in dialyzed patients with type 2 diabetes. *Kidney Int* 1999; 55: 1247–1250
76. Fogarty DG, Zychma MJ, Scott LJ, Warram JH, Krolewski AS. The C825T polymorphism in the human G-protein beta3 subunit gene is not associated with diabetic nephropathy in Type I diabetes mellitus. *Diabetologia* 1998; 41: 1304–1308
77. Zimmermann J, Wohrmann S, Passlick-Deetjen J, Siffert W, Wanner C. G-protein beta3 subunit 825T allele is associated with increased mortality in hemodialysis patients. *J Am Soc Nephrol* 1999; 10: 217A(abstract)
